# Supplementary material for: Open honeycomb frameworks of sulphides AHg4Ga5S12(A = Rb, Cs) exhibiting infrared nonlinear optical properties
Source: Royal Society of Chemistry journal article supplement (doi:10.1039/d2dt03683e), 2023-01-01
Supplement: d2dt03683e1.pdf [file d2dt03683e1.pdf]

*Supporting Information (SI)*

## **Open Honeycomb Frameworks of Sulphides $A\text{Hg}_4\text{Ga}_5\text{S}_{12}$ (A = Rb, Cs)**

### **Exhibiting Infrared Nonlinear Optical Properties**

Xiao-Yu Lou, <sup>a,b</sup> Yu Zhou, <sup>a,b</sup> Wen-Fa Chen, <sup>b</sup> Xiao-Ming Jiang, <sup>b</sup> Bin-Wen Liu, <sup>b,\*</sup>  
and Guo-Cong Guo <sup>b,\*</sup>

<sup>a</sup> *Fuzhou University, Fuzhou, Fujian 350108, People's Republic of China*

<sup>b</sup> *State Key Laboratory of Structural Chemistry, Fujian Institute of Research on the Structure of Matter, Chinese Academy of Sciences, Fuzhou, Fujian 350002, People's Republic of China*

E-mails: [bwliu@fjirsm.ac.cn](mailto:bwliu@fjirsm.ac.cn) (B.-W. Liu), [gcguo@fjirsm.ac.cn](mailto:gcguo@fjirsm.ac.cn) (G.-C. Guo)

## Contents

### Figures and Tables

**Fig. S1** EDS results.

**Fig.S2** The experimental and calculated powder XRD results of Le Bail Profile fitting procedures.

**Fig. S3** IR spectra.

**Fig. S4** Calculated refractive indexes.

**Table S1.** Fractional atomic coordinates and equivalent isotropic displacement parameters.

**Table S2.** Selected bond distances (Å).

**Table S3.** Bond Angles (°).

## Figures and Tables

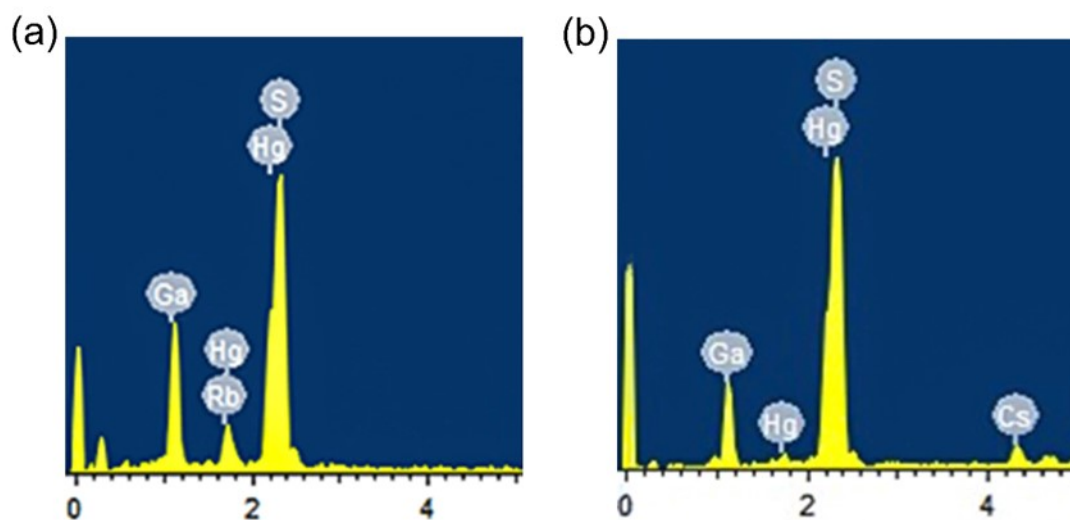

Fig. S1 EDS results of **1**(a) and **2**(b).

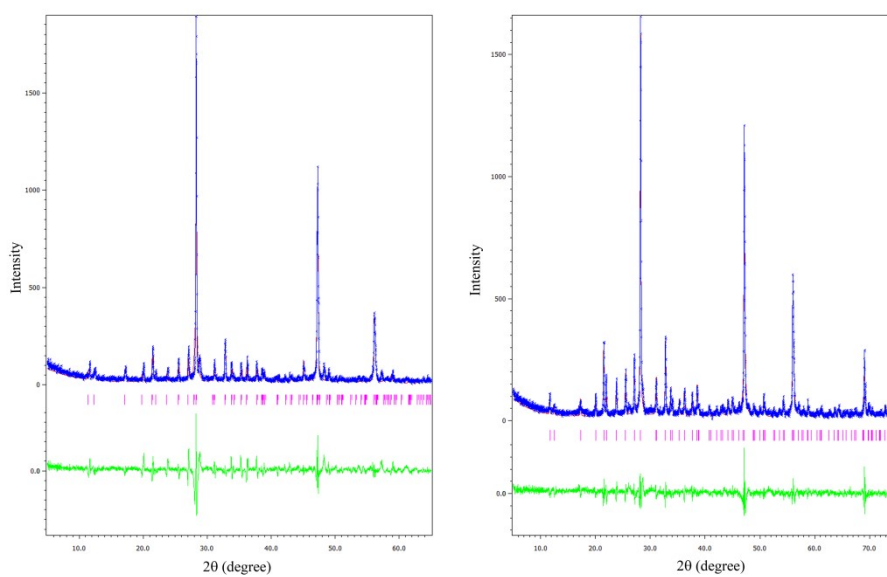

Fig. S2 The experimental (blue line) and calculated (red line) powder XRD results of Le Bail Profile fitting procedures for **1** and **2**, respectively.

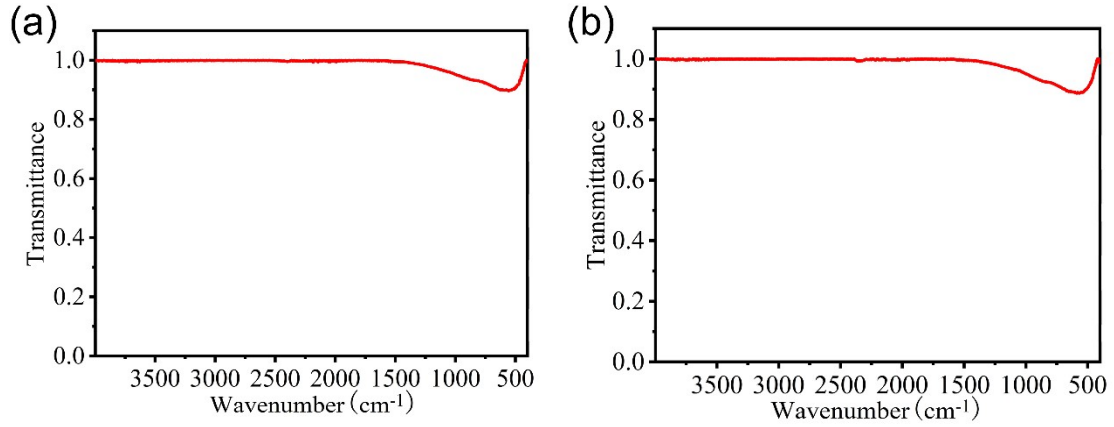

**Fig. S3** IR spectra of 1(a) and 2(b).

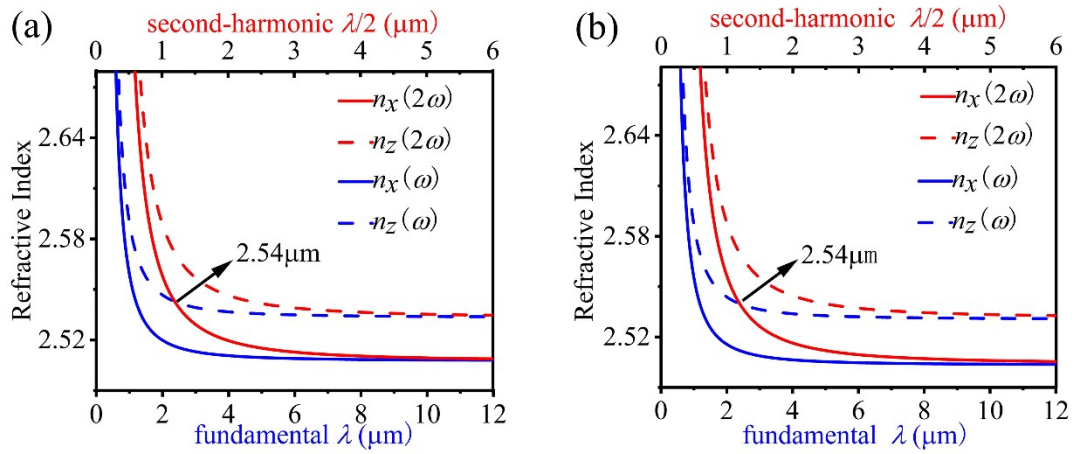

**Fig. S4** Calculated refractive indexes of 1 (a) and 2 (b).

**Table S1.** Fractional atomic coordinates ( $\times 10^4$ ) and equivalent isotropic displacement parameters ( $\text{\AA}^2 \times 10^3$ ) for **1** and **2**.

| Atom      | <i>x</i> | <i>y</i> | <i>z</i>  | U(eq)    |
|-----------|----------|----------|-----------|----------|
| <b>1</b>  |          |          |           |          |
| Rb1       | 10000    | 0        | 6973(4)   | 36.1(7)  |
| Hg/Ga (1) | 10256(3) | 4349(4)  | 1110.9(1) | 22.3(6)  |
| Hg/Ga (2) | 9476(1)  | 1283(1)  | 1179(1)   | 22.9(4)  |
| Hg/Ga (3) | 6467(3)  | -967(3)  | 1115.6(4) | 24.2(7)  |
| S1        | 5032(3)  | -2846(3) | 391(7)    | 23.4(12) |
| S2        | 6325(4)  | -1084(5) | 3666(8)   | 36.5(15) |
| S3        | 7172(3)  | 2069(3)  | 3446(7)   | 28.3(14) |
| S4        | 10340(4) | 4446(4)  | 3629(7)   | 26.6(12) |
| <b>2</b>  |          |          |           |          |
| Cs1       | 10000    | 10000    | 39(2)     | 22.5(4)  |
| Hg/Ga (1) | 7950(2)  | 5136(6)  | 9177(5)   | 27.3(5)  |
| Hg/Ga (2) | 4104(3)  | 9798(3)  | 9220(5)   | 22.9(9)  |
| Hg/Ga (3) | 6419(2)  | 8987(3)  | 9244(1)   | 21.4(6)  |
| S1        | 9230(4)  | 7005(5)  | 54(1)     | 30.1(2)  |
| S2        | 4548(4)  | 8374(4)  | 9953(6)   | 24.1(12) |
| S3        | 7002(5)  | 7750(7)  | 1001(1)   | 38.3(2)  |
| S4        | 6160(5)  | 4607(5)  | 204(5)    | 32.0(14) |

**Table S2.** Selected bond distances ( $\text{\AA}$ ) for **1** and **2**.

| Bond                       | Distance/ $\text{\AA}$ | Bond                       | Distance / $\text{\AA}$ |
|----------------------------|------------------------|----------------------------|-------------------------|
| <b>1</b>                   |                        |                            |                         |
| Rb (1)–S (1) $\times$ 3    | 3.685(5)               | Hg/Ga (2)–S (1) $\times$ 3 | 2.382(7)                |
| Rb (1)–S (2) $\times$ 3    | 3.720(5)               | Hg/Ga (3)–S (3) $\times$ 3 | 2.376(6)                |
| Rb (1)–S (3) $\times$ 3    | 3.655(5)               | Hg/Ga (2)–S (3) $\times$ 3 | 2.407(4)                |
| Rb (1)–S (4) $\times$ 3    | 3.711(5)               | Hg/Ga (2)–S (3) $\times$ 3 | 2.423(5)                |
| Hg/Ga (1)–S (1) $\times$ 3 | 2.369(6)               | Hg/Ga (2)–S (4) $\times$ 3 | 2.424(6)                |
| Hg/Ga (1)–S (2) $\times$ 3 | 2.346(8)               | Hg/Ga (3)–S (2) $\times$ 3 | 2.388(9)                |
| Hg/Ga (1)–S (4) $\times$ 3 | 2.359(6)               | Hg/Ga (1)–S (4) $\times$ 3 | 2.359(6)                |
| Hg/Ga (1)–S (4) $\times$ 3 | 2.357(7)               | Hg/Ga (2)–S (4) $\times$ 3 | 2.424(6)                |
| <b>2</b>                   |                        |                            |                         |
| Cs (1)–S (1) $\times$ 3    | 3.736(7)               | Hg/Ga (2)–S (2) $\times$ 3 | 2.439(7)                |
| Cs (1)–S (2) $\times$ 3    | 3.708(4)               | Hg/Ga (2)–S (3) $\times$ 3 | 2.402(11)               |
| Cs (1)–S (3) $\times$ 3    | 3.741(7)               | Hg/Ga (2)–S (4) $\times$ 3 | 2.369(7)                |
| Cs (1)–S (4) $\times$ 3    | 3.697(5)               | Hg/Ga (3)–S (1) $\times$ 3 | 2.356(6)                |
| Hg/Ga (1)–S (1) $\times$ 3 | 2.429(7)               | Hg/Ga (3)–S (1) $\times$ 3 | 2.372(6)                |
| Hg/Ga (1)–S (2) $\times$ 3 | 2.404(5)               | Hg/Ga (3)–S (2) $\times$ 3 | 2.382(7)                |

|                     |          |                     |          |
|---------------------|----------|---------------------|----------|
| Hg/Ga (1)–S (4) × 3 | 2.408(5) | Hg/Ga (3)–S (3) × 3 | 2.341(9) |
| Hg/Ga (1)–S (4) × 3 | 2.420(7) | Hg/Ga (1)–S (2) × 3 | 2.404(5) |

**Table S3.** Bond Angles (°) for **1** and **2**.

| Bond Angles             | Angle/°    | Bond Angles         | Angle/°    |
|-------------------------|------------|---------------------|------------|
| <b>1</b>                |            |                     |            |
| ∠S(2)-(Hg/Ga)1-S(1)     | 111.3(3)   | ∠S(3)-(Hg/Ga)2-S(3) | 102.7(2)   |
| ∠S(1)-(Hg/Ga)1-S(4)     | 107.1(3)   | ∠S(3)-(Hg/Ga)2-S(4) | 106.08(19) |
| ∠S(2)-(Hg/Ga)1-S(4)     | 105.7(2)   | ∠S(3)-(Hg/Ga)2-S(4) | 108.8(2)   |
| ∠S(4)-(Hg/Ga)1-S(1)     | 104.4(2)   | ∠S(4)-(Hg/Ga)3-S(3) | 109.9(2)   |
| ∠S(4)-(Hg/Ga)1-S(1)     | 116.2(3)   | ∠S(2)-(Hg/Ga)3-S(1) | 102.1(2)   |
| ∠S(4)-(Hg/Ga)1-S(4)     | 111.9(3)   | ∠S(2)-(Hg/Ga)3-S(2) | 108.1(2)   |
| ∠S(1)-(Hg/Ga)2-S(3)     | 112.92(18) | ∠S(3)-(Hg/Ga)3-S(1) | 110.7(3)   |
| ∠S(1)-(Hg/Ga)2-S(3)     | 112.49(16) | ∠S(3)-(Hg/Ga)3-S(2) | 116.7(2)   |
| ∠S(1)-(Hg/Ga)2-S(4)     | 113.12(19) | ∠S(3)-(Hg/Ga)3-S(2) | 110.0(2)   |
| Bond Angles             | Angle/°    | Bond Angles         | Angle/°    |
| <b>2</b>                |            |                     |            |
| ∠S(2)-(Hg/Ga)1-S(1) × 2 | 112.67(18) | ∠S(4)-(Hg/Ga)2-S(2) | 110.7(3)   |
| ∠S(2)-(Hg/Ga)1-S(4)     | 112.10(15) | ∠S(4)-(Hg/Ga)2-S(3) | 116.3(2)   |
| ∠S(2)-(Hg/Ga)1-S(4)     | 112.19(16) | ∠S(4)-(Hg/Ga)2-S(3) | 109.9(2)   |
| ∠S(4)-(Hg/Ga)1-S(1)     | 109.0(2)   | ∠S(1)-(Hg/Ga)3-S(1) | 111.7(3)   |
| ∠S(4)-(Hg/Ga)1-S(1)     | 106.27(17) | ∠S(1)-(Hg/Ga)3-S(2) | 115.8(3)   |
| ∠S(4)-(Hg/Ga)1-S(4)     | 104.1(2)   | ∠S(1)-(Hg/Ga)3-S(2) | 104.1(2)   |
| ∠S(3)-(Hg/Ga)2-S(2)     | 102.6(2)   | ∠S(3)-(Hg/Ga)3-S(1) | 107.1(3)   |
| ∠S(3)-(Hg/Ga)2-S(2)     | 108.7(3)   | ∠S(3)-(Hg/Ga)3-S(1) | 106.5(17)  |
| ∠S(3)-(Hg/Ga)2-S(3)     | 108.2(2)   | ∠S(3)-(Hg/Ga)3-S(2) | 111.4(3)   |
